# Supplementary material for: Aggregation of cohorts for histopathological diagnosis with deep morphological analysis
Source: Sci Rep. 2021 Feb 3;11:2876. doi: 10.1038/s41598-021-82642-1 (PMC7858624; doi:10.1038/s41598-021-82642-1)
Supplement: Supplementary file 1 — Supplementary Information 1. [file 41598_2021_82642_MOESM1_ESM.docx]

**SUPPLEMENTARY MATERIALS**

**Title:** Aggregation of cohorts for histopathological diagnosis with deep morphological analysis

**Authors:** Jeonghyuk Park1,+,*; Yul Ri Chung2,+, Seo Taek Kong1, Yeong Won Kim1, Hyunho Park1, Kyungdoc Kim1, Dong-Il Kim3, Kyu-Hwan Jung1

**Author affiliations:** 1VUNO Inc., Seoul, Korea, 2Pathology Center, Seegene Medical Foundation, Seoul, Korea, 3Department of Pathology, Green Cross Laboratories, Yongin, Gyeonggi, Korea,

+co-first author

*jh.park@vuno.co

**Supplementary Data Table S1**. Details of dataset configuration. Names of the TCGA slides are presented with sub-dataset number, set (train/validation/test), class (positive/negative), and cohort name. The slide level and slide level mpp (micron per pixel) indicate slide level used for patch extraction and resizing.

**Supplementary Data Table S2**. Performances and training times of all super-cohort models. Model names are abbreviated in accordance with Figure 7. Cohort names in a bracket indicate the cohorts included in a super-cohort.
