# Supplementary material for: Aggregation of cohorts for histopathological diagnosis with deep morphological analysis
Source: Sci Rep. 2021 Feb 3;11:2876. doi: 10.1038/s41598-021-82642-1 (PMC7858624; doi:10.1038/s41598-021-82642-1)
Supplement: Supplementary file 3 — Supplementary Information 3. [file 41598_2021_82642_MOESM3_ESM.xlsx]

## Sheet: Sheet1
Model (Universal/Super-cohort models/Single models)	UNIV	Single	C2	C3	C4	C5	C6	C7	C8	C9	C10	C11	N2	N3	N4	N5	N6	N7	N8	N9	N10	N11	P2	P3	P4	P5	P6	P7	P8	P9	P10	P11	A2	A3	A4	A5	A6	A7	A8	A9	A10	A11
[Cohorts in super-cohort of a model]	['KIRC', 'LIHC', 'THCA', 'OV', 'LUAD', 'LUSC', 'BLCA', 'UCEC', 'BRCA', 'PRAD', 'COAD', 'STAD']	['KIRC']	['LIHC', 'THCA', 'OV', 'LUAD', 'LUSC', 'BLCA', 'UCEC', 'BRCA', 'PRAD', 'COAD', 'STAD']	['OV', 'LUAD', 'LUSC', 'BLCA', 'UCEC', 'BRCA', 'PRAD', 'COAD', 'STAD']	['BLCA', 'UCEC', 'BRCA', 'PRAD', 'COAD', 'STAD']	['OV', 'LUAD', 'LUSC']	['OV', 'LUAD', 'LUSC']	['OV', 'LUAD', 'LUSC']	['OV', 'LUAD', 'LUSC']	['OV', 'LUAD', 'LUSC']	['OV', 'LUAD']	['OV', 'LUAD']	['KIRC', 'THCA', 'OV', 'LUAD', 'LUSC', 'BLCA', 'UCEC', 'BRCA', 'PRAD', 'COAD', 'STAD']	['KIRC', 'OV', 'LUAD', 'LUSC', 'BLCA', 'UCEC', 'BRCA', 'PRAD', 'COAD', 'STAD']	['OV', 'LUAD', 'LUSC', 'BLCA', 'UCEC', 'BRCA', 'PRAD', 'COAD', 'STAD']	['OV', 'LUAD', 'LUSC', 'BLCA', 'BRCA', 'PRAD', 'COAD', 'STAD']	['OV', 'LUAD', 'LUSC', 'BLCA', 'PRAD', 'COAD', 'STAD']	['LUAD', 'LUSC', 'BLCA', 'PRAD', 'COAD', 'STAD']	['LUAD', 'LUSC', 'COAD', 'STAD']	['LUAD', 'LUSC']	['LUAD', 'LUSC']	['LUAD', 'LUSC']	['KIRC', 'LIHC', 'THCA', 'OV', 'LUAD', 'LUSC', 'BLCA', 'UCEC', 'BRCA', 'COAD', 'STAD']	['LIHC', 'THCA', 'OV', 'LUAD', 'LUSC', 'BLCA', 'UCEC', 'BRCA', 'COAD', 'STAD']	['THCA', 'OV', 'LUAD', 'LUSC', 'BLCA', 'UCEC', 'BRCA', 'COAD', 'STAD']	['OV', 'LUAD', 'LUSC', 'BLCA', 'UCEC', 'BRCA', 'COAD', 'STAD']	['OV', 'LUAD', 'LUSC', 'BLCA', 'UCEC', 'COAD', 'STAD']	['OV', 'LUAD', 'LUSC', 'BLCA', 'COAD', 'STAD']	['OV', 'LUAD', 'LUSC', 'COAD', 'STAD']	['OV', 'LUAD', 'LUSC', 'STAD']	['LUAD', 'LUSC', 'STAD']	['LUAD', 'LUSC']	['KIRC', 'THCA', 'OV', 'LUAD', 'LUSC', 'BLCA', 'UCEC', 'BRCA', 'PRAD', 'COAD', 'STAD']	['THCA', 'OV', 'LUAD', 'LUSC', 'BLCA', 'UCEC', 'BRCA', 'PRAD', 'COAD', 'STAD']	['THCA', 'OV', 'LUAD', 'LUSC', 'BLCA', 'UCEC', 'BRCA', 'COAD', 'STAD']	['OV', 'LUAD', 'LUSC', 'BLCA', 'UCEC', 'BRCA', 'COAD', 'STAD']	['OV', 'LUAD', 'LUSC', 'BLCA', 'UCEC', 'COAD', 'STAD']	['OV', 'LUAD', 'LUSC', 'BLCA', 'COAD', 'STAD']	['OV', 'LUAD', 'LUSC', 'COAD', 'STAD']	['LUAD', 'LUSC', 'COAD', 'STAD']	['LUAD', 'LUSC', 'STAD']	['LUAD', 'LUSC']
Cohort AUROC (95% confidence interval)	KIRC 0.7778 (0.0613)	KIRC 0.9852 (0.0332)	LIHC 0.7877 (0.2584)	OV 0.9506 (0.0774)	BLCA 0.9852 (0.0274)	OV 0.9556 (0.0830)	OV 0.9556 (0.0830)	OV 0.9556 (0.0830)	OV 0.9556 (0.0830)	OV 0.9556 (0.0830)	OV 0.9654 (0.0567)	OV 0.9654 (0.0567)	KIRC 0.6864 (0.2857)	KIRC 0.8790 (0.0697)	OV 0.9506 (0.0774)	OV 0.8691 (0.0997)	OV 0.9457 (0.0656)	LUAD 0.8716 (0.1076)	LUAD 0.9333 (0.0949)	LUAD 0.9679 (0.0385)	LUAD 0.9679 (0.0385)	LUAD 0.9679 (0.0385)	KIRC 0.8296 (0.1663)	LIHC 0.6123 (0.4522)	THCA 0.9704 (0.0400)	OV 0.9136 (0.0702)	OV 0.9309 (0.0699)	OV 0.9136 (0.0907)	OV 0.9185 (0.1020)	OV 0.9556 (0.0638)	LUAD 0.9407 (0.1008)	LUAD 0.9679 (0.0385)	KIRC 0.6864 (0.2857)	THCA 0.9877 (0.0217)	THCA 0.9704 (0.0400)	OV 0.9136 (0.0702)	OV 0.9309 (0.0699)	OV 0.9136 (0.0907)	OV 0.9185 (0.1020)	LUAD 0.9333 (0.0949)	LUAD 0.9407 (0.1008)	LUAD 0.9679 (0.0385)
	LIHC 0.7728 (0.2750)	Training time 16.4 (7.3)	THCA 0.9951 (0.0137)	LUAD 0.8790 (0.0996)	UCEC 0.9901 (0.0200)	LUAD 0.9679 (0.0318)	LUAD 0.9679 (0.0318)	LUAD 0.9679 (0.0318)	LUAD 0.9679 (0.0318)	LUAD 0.9679 (0.0318)	LUAD 0.9654 (0.0524)	LUAD 0.9654 (0.0524)	THCA 0.9531 (0.1303)	OV 0.8444 (0.1508)	LUAD 0.8790 (0.0996)	LUAD 0.8716 (0.0628)	LUAD 0.9481 (0.0465)	LUSC 0.8667 (0.1013)	LUSC 0.9259 (0.1172)	LUSC 0.9309 (0.0580)	LUSC 0.9309 (0.0580)	LUSC 0.9309 (0.0580)	LIHC 0.8741 (0.2041)	THCA 0.8741 (0.3328)	OV 0.9481 (0.0706)	LUAD 0.8864 (0.0777)	LUAD 0.8741 (0.1722)	LUAD 0.8988 (0.0477)	LUAD 0.9284 (0.0777)	LUAD 0.9531 (0.0799)	LUSC 0.9383 (0.0553)	LUSC 0.9309 (0.0580)	THCA 0.9531 (0.1303)	OV 0.9432 (0.0559)	OV 0.9481 (0.0706)	LUAD 0.8864 (0.0777)	LUAD 0.8741 (0.1722)	LUAD 0.8988 (0.0477)	LUAD 0.9284 (0.0777)	LUSC 0.9259 (0.1172)	LUSC 0.9383 (0.0553)	LUSC 0.9309 (0.0580)
	THCA 0.9605 (0.0935)		OV 0.8988 (0.1031)	LUSC 0.8469 (0.1588)	BRCA 0.9802 (0.0467)	LUSC 0.9704 (0.0257)	LUSC 0.9704 (0.0257)	LUSC 0.9704 (0.0257)	LUSC 0.9704 (0.0257)	LUSC 0.9704 (0.0257)	Training time 17.4 (3.8)	Training time 17.4 (3.8)	OV 0.8963 (0.0600)	LUAD 0.8938 (0.0414)	LUSC 0.8469 (0.1588)	LUSC 0.8049 (0.1715)	LUSC 0.9407 (0.0680)	BLCA 0.9827 (0.0318)	COAD 0.9012 (0.1207)	Training time 13.6 (6.0)	Training time 13.6 (6.0)	Training time 13.6 (6.0)	THCA 0.8963 (0.2879)	OV 0.8889 (0.0774)	LUAD 0.9432 (0.0428)	LUSC 0.8617 (0.1561)	LUSC 0.8272 (0.2102)	LUSC 0.9086 (0.0949)	LUSC 0.9383 (0.0766)	LUSC 0.9432 (0.0724)	STAD 0.8741 (0.1343)	Training time 13.6 (6.0)	OV 0.8963 (0.0600)	LUAD 0.8938 (0.0385)	LUAD 0.9432 (0.0428)	LUSC 0.8617 (0.1561)	LUSC 0.8272 (0.2102)	LUSC 0.9086 (0.0949)	LUSC 0.9383 (0.0766)	COAD 0.9012 (0.1207)	STAD 0.8741 (0.1343)	Training time 13.6 (6.0)
	OV 0.8444 (0.1312)	['LIHC']	LUAD 0.8988 (0.1252)	BLCA 0.9753 (0.0287)	PRAD 0.8099 (0.0527)	Training time 18.0 (8.9)	Training time 18.0 (8.9)	Training time 18.0 (8.9)	Training time 18.0 (8.9)	Training time 18.0 (8.9)			LUAD 0.8716 (0.1248)	LUSC 0.8469 (0.0638)	BLCA 0.9753 (0.0287)	BLCA 1.0000 (0.0000)	BLCA 0.9802 (0.0336)	PRAD 0.9235 (0.0738)	STAD 0.7901 (0.2648)				OV 0.8444 (0.1195)	LUAD 0.8593 (0.1215)	LUSC 0.8617 (0.1091)	BLCA 0.9778 (0.0314)	BLCA 0.9901 (0.0274)	BLCA 0.9852 (0.0274)	COAD 0.9753 (0.0604)	STAD 0.8765 (0.1552)	Training time 22.6 (8.5)		LUAD 0.8716 (0.1248)	LUSC 0.8420 (0.1519)	LUSC 0.8617 (0.1091)	BLCA 0.9778 (0.0314)	BLCA 0.9901 (0.0274)	BLCA 0.9852 (0.0274)	COAD 0.9753 (0.0604)	STAD 0.7901 (0.2648)	Training time 22.6 (8.5)
	LUAD 0.8840 (0.1361)	LIHC 0.9951 (0.0137)	LUSC 0.8568 (0.1258)	UCEC 0.9901 (0.0128)	COAD 0.7580 (0.1757)						['LIHC', 'THCA']	['KIRC']	LUSC 0.8593 (0.1109)	BLCA 0.9556 (0.0830)	UCEC 0.9901 (0.0128)	BRCA 0.9235 (0.0929)	PRAD 0.9259 (0.0447)	COAD 0.8914 (0.1377)	Training time 13.8 (5.1)	['BLCA', 'PRAD']	['COAD', 'STAD']	['KIRC']	LUAD 0.8815 (0.1109)	LUSC 0.8025 (0.1197)	BLCA 0.9802 (0.0175)	UCEC 0.9901 (0.0200)	UCEC 0.9877 (0.0217)	COAD 0.8741 (0.1492)	STAD 0.8395 (0.2780)	Training time 20.2 (14.3)		['KIRC']	LUSC 0.8593 (0.1109)	BLCA 0.9802 (0.0278)	BLCA 0.9802 (0.0175)	UCEC 0.9901 (0.0200)	UCEC 0.9877 (0.0217)	COAD 0.8741 (0.1492)	STAD 0.8395 (0.2780)	Training time 13.8 (5.1)		['KIRC']
	LUSC 0.7704 (0.1436)	Training time 11.0 (3.2)	BLCA 0.9852 (0.0411)	BRCA 0.9630 (0.0563)	STAD 0.8321 (0.1965)	['BLCA', 'UCEC', 'BRCA', 'PRAD', 'STAD']	['UCEC', 'BRCA', 'PRAD', 'STAD']	['UCEC', 'BRCA', 'PRAD']	['BRCA', 'PRAD']	['LIHC', 'THCA']	LIHC 0.9951 (0.0137)	KIRC 0.9852 (0.0332)	BLCA 0.9852 (0.0252)	UCEC 0.9654 (0.0366)	BRCA 0.9630 (0.0563)	PRAD 0.8963 (0.0844)	COAD 0.9630 (0.0797)	STAD 0.8173 (0.2095)		BLCA 0.9975 (0.0069)	COAD 0.9951 (0.0137)	KIRC 0.9852 (0.0332)	LUSC 0.8765 (0.0702)	BLCA 0.9630 (0.0508)	UCEC 0.9901 (0.0200)	BRCA 0.9210 (0.1348)	COAD 0.8420 (0.1736)	STAD 0.7432 (0.2728)	Training time 20.4 (10.0)		['KIRC']	KIRC 0.9852 (0.0332)	BLCA 0.9852 (0.0252)	UCEC 0.9975 (0.0069)	UCEC 0.9901 (0.0200)	BRCA 0.9210 (0.1348)	COAD 0.8420 (0.1736)	STAD 0.7432 (0.2728)	Training time 20.4 (10.0)		['KIRC']	KIRC 0.9852 (0.0332)
	BLCA 0.9802 (0.0548)		UCEC 0.9877 (0.0217)	PRAD 0.8815 (0.1119)	Training time 12.8 (5.4)	BLCA 0.9901 (0.0274)	UCEC 0.9951 (0.0137)	UCEC 0.9728 (0.0535)	BRCA 0.9654 (0.0546)	LIHC 0.9951 (0.0137)	THCA 1.0000 (0.0000)	Training time 16.4 (7.3)	UCEC 0.9556 (0.0904)	BRCA 0.8741 (0.1782)	PRAD 0.8815 (0.1119)	COAD 0.7728 (0.2145)	STAD 0.8642 (0.1474)	Training time 13.2 (4.8)	['BLCA', 'PRAD']	PRAD 0.9062 (0.0638)	STAD 0.9827 (0.0336)	Training time 16.4 (7.3)	BLCA 0.9654 (0.0588)	UCEC 0.9432 (0.0844)	BRCA 0.9630 (0.0574)	COAD 0.7778 (0.1801)	STAD 0.7654 (0.1981)	Training time 14.2 (8.4)		['KIRC']	KIRC 0.9852 (0.0332)	Training time 16.4 (7.3)	UCEC 0.9556 (0.0904)	BRCA 0.9481 (0.0706)	BRCA 0.9630 (0.0574)	COAD 0.7778 (0.1801)	STAD 0.7654 (0.1981)	Training time 14.2 (8.4)		['KIRC']	KIRC 0.9852 (0.0332)	Training time 16.4 (7.3)
	UCEC 0.9852 (0.0332)	['THCA']	BRCA 0.9383 (0.0847)	COAD 0.8000 (0.1838)		UCEC 0.9753 (0.0307)	BRCA 0.9481 (0.0578)	BRCA 0.9605 (0.0477)	PRAD 0.9185 (0.0885)	THCA 1.0000 (0.0000)	Training time 9.6 (2.6)		BRCA 0.9531 (0.0909)	PRAD 0.8716 (0.1043)	COAD 0.8000 (0.1838)	STAD 0.7432 (0.2311)	Training time 19.4 (7.2)		BLCA 0.9975 (0.0069)	Training time 13.8 (7.1)	Training time 22.8 (13.8)		UCEC 0.9901 (0.0200)	BRCA 0.8667 (0.2854)	COAD 0.8099 (0.1109)	STAD 0.7235 (0.2089)	Training time 16.8 (9.6)		['KIRC']	KIRC 0.9852 (0.0332)	Training time 16.4 (7.3)		BRCA 0.9531 (0.0909)	PRAD 0.9358 (0.0706)	COAD 0.8099 (0.1109)	STAD 0.7235 (0.2089)	Training time 16.8 (9.6)		['KIRC']	KIRC 0.9852 (0.0332)	Training time 16.4 (7.3)
	BRCA 0.9432 (0.0808)	THCA 0.9951 (0.0137)	PRAD 0.9136 (0.0982)	STAD 0.8642 (0.0447)	['OV', 'LUAD', 'LUSC']	BRCA 0.9531 (0.0557)	PRAD 0.9358 (0.0636)	PRAD 0.9235 (0.1070)	Training time 11.8 (4.2)	Training time 9.6 (2.6)		['LIHC']	PRAD 0.8741 (0.0909)	COAD 0.7802 (0.1869)	STAD 0.8642 (0.0447)	Training time 12.0 (7.4)		['KIRC']	PRAD 0.9062 (0.0638)			['LIHC']	BRCA 0.8519 (0.3058)	COAD 0.7333 (0.2386)	STAD 0.8099 (0.0930)	Training time 13.8 (3.0)		['KIRC']	KIRC 0.9852 (0.0332)	Training time 16.4 (7.3)		['LIHC']	PRAD 0.8741 (0.0909)	COAD 0.7901 (0.2042)	STAD 0.8099 (0.0930)	Training time 13.8 (3.0)		['KIRC']	KIRC 0.9852 (0.0332)	Training time 16.4 (7.3)		['LIHC']
	PRAD 0.8765 (0.0811)	Training time 10.8 (8.0)	COAD 0.8099 (0.1076)	Training time 14.8 (5.7)	OV 0.9556 (0.0830)	PRAD 0.8790 (0.1053)	STAD 0.8420 (0.1284)	Training time 12.6 (3.7)			['KIRC']	LIHC 0.9951 (0.0137)	COAD 0.7580 (0.1770)	STAD 0.7086 (0.3439)	Training time 14.8 (5.7)		['KIRC']	KIRC 0.9852 (0.0332)	Training time 13.8 (7.1)	['COAD', 'STAD']	['KIRC']	LIHC 0.9951 (0.0137)	COAD 0.7580 (0.3036)	STAD 0.7556 (0.2386)	Training time 13.4 (6.7)		['KIRC']	KIRC 0.9852 (0.0332)	Training time 16.4 (7.3)		['LIHC']	LIHC 0.9951 (0.0137)	COAD 0.7580 (0.1770)	STAD 0.8173 (0.1377)	Training time 13.4 (6.7)		['KIRC']	KIRC 0.9852 (0.0332)	Training time 16.4 (7.3)		['LIHC']	LIHC 0.9951 (0.0137)
	COAD 0.7210 (0.1695)		STAD 0.7556 (0.1863)		LUAD 0.9679 (0.0318)	STAD 0.7630 (0.1876)	Training time 16.0 (8.3)		['LIHC', 'THCA']	['KIRC']	KIRC 0.9852 (0.0332)	Training time 11.0 (3.2)	STAD 0.7679 (0.1139)	Training time 17.4 (10.3)		['KIRC']	KIRC 0.9852 (0.0332)	Training time 16.4 (7.3)		COAD 0.9951 (0.0137)	KIRC 0.9852 (0.0332)	Training time 11.0 (3.2)	STAD 0.7926 (0.2078)	Training time 12.8 (10.5)		['KIRC']	KIRC 0.9852 (0.0332)	Training time 16.4 (7.3)		['LIHC']	LIHC 0.9951 (0.0137)	Training time 11.0 (3.2)	STAD 0.7679 (0.1139)	Training time 17.4 (9.2)		['KIRC']	KIRC 0.9852 (0.0332)	Training time 16.4 (7.3)		['LIHC']	LIHC 0.9951 (0.0137)	Training time 11.0 (3.2)
	STAD 0.7679 (0.2722)	['OV']	Training time 14.0 (6.3)	['LIHC', 'THCA']	LUSC 0.9704 (0.0257)	Training time 12.0 (5.0)		['LIHC', 'THCA']	LIHC 0.9951 (0.0137)	KIRC 0.9852 (0.0332)	Training time 16.4 (7.3)		Training time 11.8 (5.1)		['KIRC']	KIRC 0.9852 (0.0332)	Training time 16.4 (7.3)		['KIRC']	STAD 0.9827 (0.0336)	Training time 16.4 (7.3)		Training time 17.2 (9.7)		['KIRC']	KIRC 0.9852 (0.0332)	Training time 16.4 (7.3)		['LIHC']	LIHC 0.9951 (0.0137)	Training time 11.0 (3.2)		Training time 11.8 (5.1)		['KIRC']	KIRC 0.9852 (0.0332)	Training time 16.4 (7.3)		['LIHC']	LIHC 0.9951 (0.0137)	Training time 11.0 (3.2)
Training time of a model [epochs] (95% confidence interval)	Training time 13.2 (8.8)	OV 0.9630 (0.0735)		LIHC 0.9951 (0.0137)	Training time 18.0 (8.9)		['LIHC', 'THCA']	LIHC 0.9951 (0.0137)	THCA 1.0000 (0.0000)	Training time 16.4 (7.3)		['THCA']		['LIHC']	KIRC 0.9852 (0.0332)	Training time 16.4 (7.3)		['LIHC']	KIRC 0.9852 (0.0332)	Training time 22.8 (13.8)		['THCA']		['KIRC']	KIRC 0.9852 (0.0332)	Training time 16.4 (7.3)		['LIHC']	LIHC 0.9951 (0.0137)	Training time 11.0 (3.2)		['THCA']		['KIRC']	KIRC 0.9852 (0.0332)	Training time 16.4 (7.3)		['LIHC']	LIHC 0.9951 (0.0137)	Training time 11.0 (3.2)		['THCA']
		Training time 11.6 (1.1)	['KIRC']	THCA 1.0000 (0.0000)		['LIHC', 'THCA']	LIHC 0.9951 (0.0137)	THCA 1.0000 (0.0000)	Training time 9.6 (2.6)		['LUSC']	THCA 0.9951 (0.0137)	['LIHC']	LIHC 0.9951 (0.0137)	Training time 16.4 (7.3)		['LIHC']	LIHC 0.9951 (0.0137)	Training time 16.4 (7.3)		['LIHC']	THCA 0.9951 (0.0137)	['PRAD']	KIRC 0.9852 (0.0332)	Training time 16.4 (7.3)		['LIHC']	LIHC 0.9951 (0.0137)	Training time 11.0 (3.2)		['THCA']	THCA 0.9951 (0.0137)	['LIHC']	KIRC 0.9852 (0.0332)	Training time 16.4 (7.3)		['LIHC']	LIHC 0.9951 (0.0137)	Training time 11.0 (3.2)		['THCA']	THCA 0.9951 (0.0137)
Average AUROC (95% confidence interval)	Average 0.8570 (0.0702)		KIRC 0.9852 (0.0332)	Training time 9.6 (2.6)	['LIHC', 'THCA']	LIHC 0.9951 (0.0137)	THCA 1.0000 (0.0000)	Training time 9.6 (2.6)		['BLCA']	LUSC 0.9728 (0.0350)	Training time 10.8 (8.0)	LIHC 0.9951 (0.0137)	Training time 11.0 (3.2)		['LIHC']	LIHC 0.9951 (0.0137)	Training time 11.0 (3.2)		['KIRC']	LIHC 0.9951 (0.0137)	Training time 10.8 (8.0)	PRAD 0.9235 (0.0636)	Training time 16.4 (7.3)		['LIHC']	LIHC 0.9951 (0.0137)	Training time 11.0 (3.2)		['THCA']	THCA 0.9951 (0.0137)	Training time 10.8 (8.0)	LIHC 0.9951 (0.0137)	Training time 16.4 (7.3)		['LIHC']	LIHC 0.9951 (0.0137)	Training time 11.0 (3.2)		['THCA']	THCA 0.9951 (0.0137)	Training time 10.8 (8.0)
Sum of training time of models [epochs] (95% confidence interval)	Sum of training time 13.2 (8.8)	['LUAD']	Training time 16.4 (7.3)		LIHC 0.9951 (0.0137)	THCA 1.0000 (0.0000)	Training time 9.6 (2.6)		['KIRC']	BLCA 0.9877 (0.0217)	Training time 18.2 (5.4)		Training time 11.0 (3.2)		['LIHC']	LIHC 0.9951 (0.0137)	Training time 11.0 (3.2)		['LIHC']	KIRC 0.9852 (0.0332)	Training time 11.0 (3.2)		Training time 13.0 (2.0)		['LIHC']	LIHC 0.9951 (0.0137)	Training time 11.0 (3.2)		['THCA']	THCA 0.9951 (0.0137)	Training time 10.8 (8.0)		Training time 11.0 (3.2)		['LIHC']	LIHC 0.9951 (0.0137)	Training time 11.0 (3.2)		['THCA']	THCA 0.9951 (0.0137)	Training time 10.8 (8.0)
		LUAD 0.9605 (0.0524)		['KIRC']	THCA 1.0000 (0.0000)	Training time 9.6 (2.6)		['KIRC']	KIRC 0.9852 (0.0332)	Training time 11.8 (6.4)		['LUSC']		['THCA']	LIHC 0.9951 (0.0137)	Training time 11.0 (3.2)		['THCA']	LIHC 0.9951 (0.0137)	Training time 16.4 (7.3)		['OV']		['PRAD']	LIHC 0.9951 (0.0137)	Training time 11.0 (3.2)		['THCA']	THCA 0.9951 (0.0137)	Training time 10.8 (8.0)		['OV']		['LIHC']	LIHC 0.9951 (0.0137)	Training time 11.0 (3.2)		['THCA']	THCA 0.9951 (0.0137)	Training time 10.8 (8.0)		['OV']
		Training time 15.8 (4.5)	Average 0.9010 (0.0554)	KIRC 0.9852 (0.0332)	Training time 9.6 (2.6)		['KIRC']	KIRC 0.9852 (0.0332)	Training time 16.4 (7.3)		['BLCA']	LUSC 0.9728 (0.0350)	Average 0.8796 (0.0646)	THCA 0.9951 (0.0137)	Training time 11.0 (3.2)		['THCA']	THCA 0.9951 (0.0137)	Training time 11.0 (3.2)		['THCA']	OV 0.9630 (0.0735)	Average 0.8737 (0.1203)	PRAD 0.9235 (0.0636)	Training time 11.0 (3.2)		['THCA']	THCA 0.9951 (0.0137)	Training time 10.8 (8.0)		['OV']	OV 0.9630 (0.0735)	Average 0.8796 (0.0646)	LIHC 0.9951 (0.0137)	Training time 11.0 (3.2)		['THCA']	THCA 0.9951 (0.0137)	Training time 10.8 (8.0)		['OV']	OV 0.9630 (0.0735)
			Sum of training time 30.4 (8.2)	Training time 16.4 (7.3)		['KIRC']	KIRC 0.9852 (0.0332)	Training time 16.4 (7.3)		['UCEC']	BLCA 0.9877 (0.0217)	Training time 18.2 (5.4)	Sum of training time 22.8 (7.1)	Training time 10.8 (8.0)		['THCA']	THCA 0.9951 (0.0137)	Training time 10.8 (8.0)		['LIHC']	THCA 0.9951 (0.0137)	Training time 11.6 (1.1)	Sum of training time 30.2 (8.6)	Training time 13.0 (2.0)		['THCA']	THCA 0.9951 (0.0137)	Training time 10.8 (8.0)		['BLCA']	OV 0.9630 (0.0735)	Training time 11.6 (1.1)	Sum of training time 22.8 (7.1)	Training time 11.0 (3.2)		['THCA']	THCA 0.9951 (0.0137)	Training time 10.8 (8.0)		['OV']	OV 0.9630 (0.0735)	Training time 11.6 (1.1)
		['LUSC']			['KIRC']	KIRC 0.9852 (0.0332)	Training time 16.4 (7.3)		['BLCA']	UCEC 0.9877 (0.0217)	Training time 11.8 (6.4)				['THCA']	THCA 0.9951 (0.0137)	Training time 10.8 (8.0)		['THCA']	LIHC 0.9951 (0.0137)	Training time 10.8 (8.0)				['PRAD']	THCA 0.9951 (0.0137)	Training time 10.8 (8.0)		['BLCA']	BLCA 0.9877 (0.0217)	Training time 11.6 (1.1)				['PRAD']	THCA 0.9951 (0.0137)	Training time 10.8 (8.0)		['BLCA']	OV 0.9630 (0.0735)	Training time 11.6 (1.1)
		LUSC 0.9728 (0.0350)		Average 0.9276 (0.0342)	KIRC 0.9852 (0.0332)	Training time 16.4 (7.3)		['BLCA']	BLCA 0.9877 (0.0217)	Training time 12.6 (4.4)		['BLCA']		Average 0.8842 (0.0014)	THCA 0.9951 (0.0137)	Training time 10.8 (8.0)		['OV']	THCA 0.9951 (0.0137)	Training time 11.0 (3.2)		['BLCA']		Average 0.8506 (0.1169)	PRAD 0.9235 (0.0636)	Training time 10.8 (8.0)		['UCEC']	BLCA 0.9877 (0.0217)	Training time 11.8 (6.4)		['BLCA']		Average 0.9263 (0.0318)	PRAD 0.9235 (0.0636)	Training time 10.8 (8.0)		['UCEC']	BLCA 0.9877 (0.0217)	Training time 11.6 (1.1)		['BLCA']
		Training time 18.2 (5.4)		Sum of training time 40.8 (9.5)	Training time 16.4 (7.3)		['BLCA']	BLCA 0.9877 (0.0217)	Training time 11.8 (6.4)		['UCEC']	BLCA 0.9877 (0.0217)		Sum of training time 39.2 (10.9)	Training time 10.8 (8.0)		['UCEC']	OV 0.9630 (0.0735)	Training time 10.8 (8.0)		['OV']	BLCA 0.9877 (0.0217)		Sum of training time 42.2 (9.1)	Training time 13.0 (2.0)		['BRCA']	UCEC 0.9877 (0.0217)	Training time 11.8 (6.4)		['BLCA']	BLCA 0.9877 (0.0217)		Sum of training time 44.8 (17.1)	Training time 13.0 (2.0)		['BRCA']	UCEC 0.9877 (0.0217)	Training time 11.8 (6.4)		['BLCA']	BLCA 0.9877 (0.0217)
						['COAD']	BLCA 0.9877 (0.0217)	Training time 11.8 (6.4)		['BRCA']	UCEC 0.9877 (0.0217)	Training time 11.8 (6.4)				['UCEC']	UCEC 0.9877 (0.0217)	Training time 11.6 (1.1)		['THCA']	OV 0.9630 (0.0735)	Training time 11.8 (6.4)				['PRAD']	BRCA 0.9827 (0.0299)	Training time 12.6 (4.4)		['UCEC']	BLCA 0.9877 (0.0217)	Training time 11.8 (6.4)				['PRAD']	BRCA 0.9827 (0.0299)	Training time 12.6 (4.4)		['BLCA']	BLCA 0.9877 (0.0217)	Training time 11.8 (6.4)
		['BLCA']			Average 0.9358 (0.0183)	COAD 1.0000 (0.0000)	Training time 11.8 (6.4)		['UCEC']	BRCA 0.9827 (0.0299)	Training time 12.6 (4.4)				Average 0.9272 (0.0347)	UCEC 0.9877 (0.0217)	Training time 12.6 (4.4)		['OV']	THCA 0.9951 (0.0137)	Training time 11.6 (1.1)				Average 0.9317 (0.0216)	PRAD 0.9235 (0.0636)	Training time 11.4 (5.2)		['UCEC']	UCEC 0.9877 (0.0217)	Training time 11.8 (6.4)				Average 0.9317 (0.0216)	PRAD 0.9235 (0.0636)	Training time 11.4 (5.2)		['UCEC']	BLCA 0.9877 (0.0217)	Training time 11.8 (6.4)
		BLCA 0.9877 (0.0217)			Sum of training time 56.8 (17.2)	Training time 18.2 (6.7)		['COAD']	UCEC 0.9877 (0.0217)	Training time 11.4 (5.2)		['UCEC']			Sum of training time 53.0 (10.8)	Training time 12.6 (4.4)		['UCEC']	OV 0.9630 (0.0735)	Training time 10.8 (8.0)		['UCEC']			Sum of training time 53.8 (15.4)	Training time 13.0 (2.0)		['BRCA']	UCEC 0.9877 (0.0217)	Training time 12.6 (4.4)		['UCEC']			Sum of training time 53.8 (15.4)	Training time 13.0 (2.0)		['BRCA']	UCEC 0.9877 (0.0217)	Training time 11.8 (6.4)		['UCEC']
		Training time 11.8 (6.4)					['COAD']	COAD 1.0000 (0.0000)	Training time 12.6 (4.4)		['BRCA']	UCEC 0.9877 (0.0217)					['BRCA']	UCEC 0.9877 (0.0217)	Training time 11.6 (1.1)		['BLCA']	UCEC 0.9877 (0.0217)					['PRAD']	BRCA 0.9827 (0.0299)	Training time 12.6 (4.4)		['UCEC']	UCEC 0.9877 (0.0217)					['PRAD']	BRCA 0.9827 (0.0299)	Training time 12.6 (4.4)		['UCEC']	UCEC 0.9877 (0.0217)
						Average 0.9529 (0.0232)	COAD 1.0000 (0.0000)	Training time 18.2 (6.7)		['PRAD']	BRCA 0.9827 (0.0299)	Training time 12.6 (4.4)				Average 0.9037 (0.0452)	BRCA 0.9827 (0.0299)	Training time 12.6 (4.4)		['OV']	BLCA 0.9877 (0.0217)	Training time 12.6 (4.4)				Average 0.9126 (0.0398)	PRAD 0.9235 (0.0636)	Training time 11.4 (5.2)		['BRCA']	UCEC 0.9877 (0.0217)	Training time 12.6 (4.4)				Average 0.9126 (0.0398)	PRAD 0.9235 (0.0636)	Training time 11.4 (5.2)		['UCEC']	UCEC 0.9877 (0.0217)	Training time 12.6 (4.4)
		['UCEC']				Sum of training time 74.2 (14.1)	Training time 18.2 (6.7)		['COAD']	PRAD 0.9235 (0.0636)	Training time 11.4 (5.2)					Sum of training time 62.8 (17.4)	Training time 11.4 (5.2)		['UCEC']	OV 0.9630 (0.0735)	Training time 11.8 (6.4)					Sum of training time 65.0 (10.4)	Training time 13.0 (2.0)		['BRCA']	BRCA 0.9827 (0.0299)	Training time 12.6 (4.4)					Sum of training time 65.0 (10.4)	Training time 13.0 (2.0)		['BRCA']	UCEC 0.9877 (0.0217)	Training time 12.6 (4.4)
		UCEC 0.9877 (0.0217)						['STAD']	COAD 1.0000 (0.0000)	Training time 13.0 (2.0)		['BRCA']						['BRCA']	UCEC 0.9877 (0.0217)	Training time 11.6 (1.1)		['BRCA']						['PRAD']	BRCA 0.9827 (0.0299)	Training time 11.4 (5.2)		['BRCA']						['PRAD']	BRCA 0.9827 (0.0299)	Training time 12.6 (4.4)		['BRCA']
		Training time 12.6 (4.4)					Average 0.9652 (0.0194)	STAD 0.8716 (0.1783)	Training time 18.2 (6.7)		['PRAD']	BRCA 0.9827 (0.0299)					Average 0.9595 (0.0314)	BRCA 0.9827 (0.0299)	Training time 12.6 (4.4)		['UCEC']	BRCA 0.9827 (0.0299)					Average 0.9249 (0.0438)	PRAD 0.9235 (0.0636)	Training time 11.4 (5.2)		['BRCA']	BRCA 0.9827 (0.0299)					Average 0.9249 (0.0438)	PRAD 0.9235 (0.0636)	Training time 11.4 (5.2)		['BRCA']	BRCA 0.9827 (0.0299)
							Sum of training time 90.0 (17.7)	Training time 15.8 (6.2)		['COAD']	PRAD 0.9235 (0.0636)	Training time 11.4 (5.2)					Sum of training time 81.6 (22.9)	Training time 11.4 (5.2)		['UCEC']	UCEC 0.9877 (0.0217)	Training time 11.4 (5.2)					Sum of training time 79.4 (15.9)	Training time 13.0 (2.0)		['PRAD']	BRCA 0.9827 (0.0299)	Training time 11.4 (5.2)					Sum of training time 79.4 (15.9)	Training time 13.0 (2.0)		['BRCA']	BRCA 0.9827 (0.0299)	Training time 11.4 (5.2)
		['BRCA']							['STAD']	COAD 1.0000 (0.0000)	Training time 13.0 (2.0)								['BRCA']	UCEC 0.9877 (0.0217)	Training time 12.6 (4.4)								['PRAD']	PRAD 0.9235 (0.0636)	Training time 11.4 (5.2)								['PRAD']	BRCA 0.9827 (0.0299)	Training time 11.4 (5.2)
		BRCA 0.9827 (0.0299)						Average 0.9658 (0.0173)	STAD 0.8716 (0.1783)	Training time 18.2 (6.7)		['PRAD']						Average 0.9385 (0.0283)	BRCA 0.9827 (0.0299)	Training time 12.6 (4.4)		['PRAD']						Average 0.9327 (0.0377)	PRAD 0.9235 (0.0636)	Training time 13.0 (2.0)		['PRAD']						Average 0.9327 (0.0377)	PRAD 0.9235 (0.0636)	Training time 11.4 (5.2)		['PRAD']
		Training time 11.4 (5.2)						Sum of training time 102.4 (11.9)	Training time 15.8 (6.2)		['COAD']	PRAD 0.9235 (0.0636)						Sum of training time 87.0 (14.8)	Training time 11.4 (5.2)		['BRCA']	PRAD 0.9235 (0.0636)						Sum of training time 89.4 (20.0)	Training time 13.0 (2.0)		['PRAD']	PRAD 0.9235 (0.0636)						Sum of training time 89.4 (20.0)	Training time 13.0 (2.0)		['PRAD']	PRAD 0.9235 (0.0636)
										['STAD']	COAD 1.0000 (0.0000)	Training time 13.0 (2.0)								['BRCA']	BRCA 0.9827 (0.0299)	Training time 13.0 (2.0)								['COAD']	PRAD 0.9235 (0.0636)	Training time 13.0 (2.0)								['PRAD']	PRAD 0.9235 (0.0636)	Training time 13.0 (2.0)
		['PRAD']							Average 0.9671 (0.0117)	STAD 0.8716 (0.1783)	Training time 18.2 (6.7)								Average 0.9469 (0.0349)	BRCA 0.9827 (0.0299)	Training time 11.4 (5.2)								Average 0.9547 (0.0416)	COAD 1.0000 (0.0000)	Training time 13.0 (2.0)								Average 0.9547 (0.0416)	PRAD 0.9235 (0.0636)	Training time 13.0 (2.0)
		PRAD 0.9235 (0.0636)							Sum of training time 114.2 (17.6)	Training time 15.8 (6.2)		['COAD']							Sum of training time 101.4 (18.6)	Training time 11.4 (5.2)		['COAD']							Sum of training time 107.4 (31.7)	Training time 18.2 (6.7)		['COAD']							Sum of training time 107.4 (31.7)	Training time 13.0 (2.0)		['COAD']
		Training time 13.0 (2.0)									['STAD']	COAD 1.0000 (0.0000)									['PRAD']	COAD 1.0000 (0.0000)									['COAD']	COAD 1.0000 (0.0000)									['COAD']	COAD 1.0000 (0.0000)
										Average 0.9689 (0.0148)	STAD 0.8716 (0.1783)	Training time 18.2 (6.7)								Average 0.9741 (0.0129)	PRAD 0.9235 (0.0636)	Training time 18.2 (6.7)								Average 0.9654 (0.0230)	COAD 1.0000 (0.0000)	Training time 18.2 (6.7)								Average 0.9475 (0.0330)	COAD 1.0000 (0.0000)	Training time 18.2 (6.7)
		['COAD']								Sum of training time 126.8 (20.2)	Training time 15.8 (6.2)									Sum of training time 124.0 (24.5)	Training time 13.0 (2.0)									Sum of training time 125.4 (27.6)	Training time 18.2 (6.7)									Sum of training time 112.4 (23.2)	Training time 18.2 (6.7)
		COAD 1.0000 (0.0000)										['STAD']										['STAD']										['STAD']										['STAD']
		Training time 18.2 (6.7)									Average 0.9698 (0.0182)	STAD 0.8716 (0.1783)									Average 0.9747 (0.0095)	STAD 0.8716 (0.1783)									Average 0.9644 (0.0128)	STAD 0.8716 (0.1783)									Average 0.9644 (0.0183)	STAD 0.8716 (0.1783)
											Sum of training time 144.4 (22.8)	Training time 15.8 (6.2)									Sum of training time 135.0 (23.9)	Training time 15.8 (6.2)									Sum of training time 139.4 (26.9)	Training time 15.8 (6.2)									Sum of training time 139.4 (26.9)	Training time 15.8 (6.2)
		['STAD']
		STAD 0.8716 (0.1783)										Average 0.9693 (0.0182)										Average 0.9658 (0.0183)										Average 0.9658 (0.0183)										Average 0.9658 (0.0183)
		Training time 15.8 (6.2)										Sum of training time 156.6 (22.4)										Sum of training time 146.2 (20.5)										Sum of training time 146.2 (20.5)										Sum of training time 146.2 (20.5)
		Average 0.9687 (0.0173)
		Sum of training time 166.6 (18.7)
